# Supplementary material for: A model of estrogen-related gene expression reveals non-linear effects in transcriptional response to tamoxifen
Source: PubMed Central journal article supplement (PMC3573949; doi:10.1186/1752-0509-6-138), 2012-11-08
Supplement: 1752-0509-6-138-S3.pdf [file 1752-0509-6-138-S3.pdf]

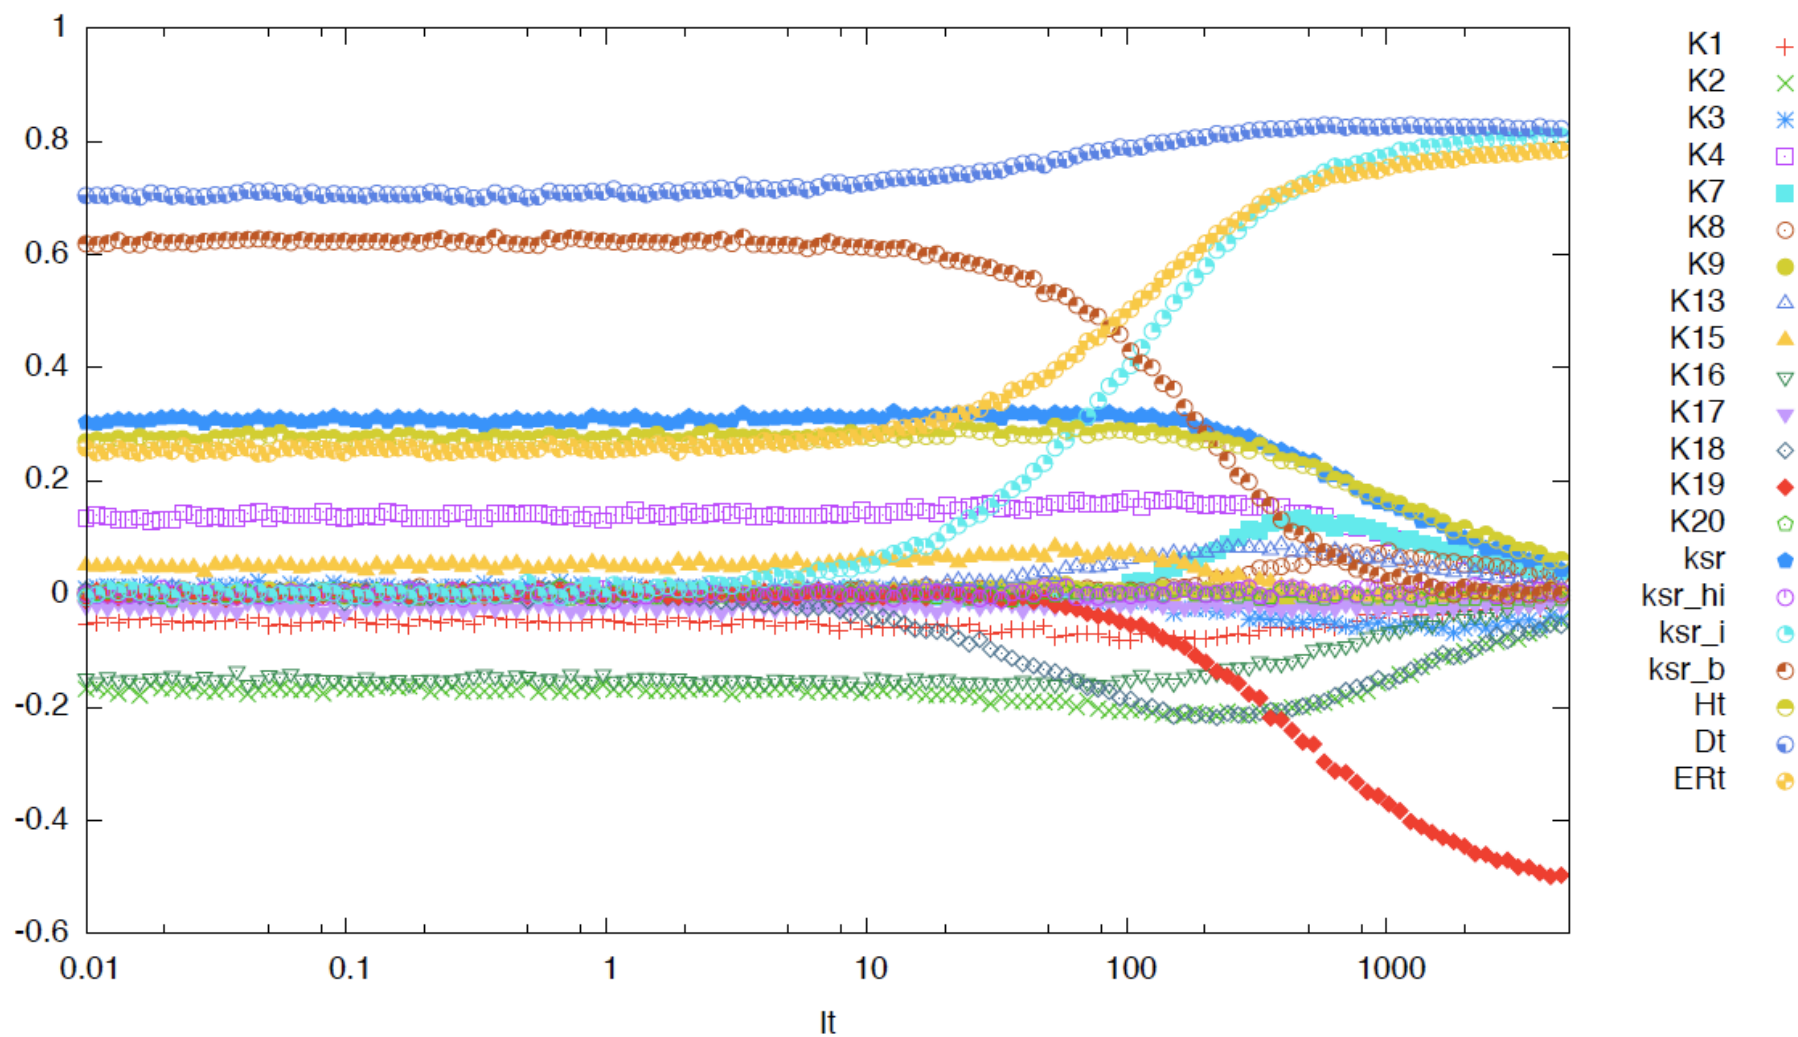

**Supplementary Figure S1.** The full spectrum of sensitivity of ER-dependent protein expression  $\bar{p}$  to the variation of the model parameters, calculated in the broad range of tamoxifen concentrations. Each colored label on the graph represents a value of PRCC coefficient between  $\bar{p}$  and corresponding parameter, calculated at certain fixed tamoxifen concentration  $It$ , as shown on the x axis.
