# Supplementary material for: A model of estrogen-related gene expression reveals non-linear effects in transcriptional response to tamoxifen
Source: PubMed Central journal article supplement (PMC3573949; doi:10.1186/1752-0509-6-138), 2012-11-08
Supplement: 1752-0509-6-138-S6.pdf [file 1752-0509-6-138-S6.pdf]

## **Additional File 6**

### **The list of parameters and parameter constraints for GSA**

The parameter constraints for GSA were chosen based on biologically plausible assumptions about natural variability of each of the parameters and on available estimates from experimental studies (see Additional File 4).

| Parameter      | Distribution | Central value | $\sigma$ |
|----------------|--------------|---------------|----------|
| K <sub>1</sub> | Gaussian     | 25.0          | 1.0      |
| K <sub>2</sub> | Gaussian     | 0.2           | 0.04     |
| K <sub>3</sub> | Gaussian     | 0.1           | 0.02     |
| K <sub>4</sub> | Gaussian     | 0.25          | 0.02     |

| Parameter          | Distribution | Lower limit | Upper limit |
|--------------------|--------------|-------------|-------------|
| K <sub>7</sub>     | Uniform      | 1.0         | 50          |
| K <sub>8</sub>     | Uniform      | 50          | 300         |
| K <sub>9</sub>     | Uniform      | 26          | 100         |
| K <sub>13</sub>    | Uniform      | 0.1         | 10          |
| K <sub>15</sub>    | Uniform      | 2.0         | 17          |
| K <sub>16</sub>    | Uniform      | 1.0         | 3.0         |
| K <sub>17</sub>    | Uniform      | 1.0         | 3.0         |
| K <sub>18</sub>    | Uniform      | 10          | 100         |
| K <sub>19</sub>    | Uniform      | 20          | 120         |
| K <sub>20</sub>    | Uniform      | 10          | 100         |
| k <sub>sr,h</sub>  | Uniform      | 0.05        | 0.5         |
| k <sub>sr,hi</sub> | Uniform      | 0.01        | 0.1         |
| k <sub>sr,i</sub>  | Uniform      | 0.01        | 0.1         |
| k <sub>sr,b</sub>  | Uniform      | 0.0005      | 0.05        |
| H <sub>t</sub>     | Uniform      | 0.1         | 1.0         |
| D <sub>t</sub>     | Uniform      | 0.1         | 1.0         |
| ER <sub>t</sub>    | Uniform      | 1.0         | 200.0       |

For the majority of the model parameters we sampled the values from the uniform distribution between lower and upper limits, with the exception of K<sub>1</sub>, K<sub>2</sub>, K<sub>3</sub>, and K<sub>4</sub>, whose values were sampled from the Gaussian distribution. This is due to the fact that dissociation constants K<sub>1</sub>-K<sub>4</sub> correspond to the binding of natural hormone 17 $\beta$ -estradiol with ER and supposedly their values are subject to less biological variability than the rest of model parameters. In addition to that, the available data set (see Fig.2 in the main text) allowed more reliable identification of these values, as compared to the rest of model parameters.
